# Supplementary material
Source: PubMed Central journal article supplement (PMC4078885)
Supplement: rspb20133172supp1.pdf [file rspb20133172supp1.pdf]

# The influence of social norms on the dynamics of vaccinating behaviour for paediatric infectious diseases

Tamer Oraby<sup>1,\*</sup>, Vivek Thampi<sup>1</sup>, Chris T. Bauch<sup>1,2</sup>

**1** Department of Mathematics and Statistics, University of Guelph, Guelph, Ontario, Canada

**2** Department of Applied Mathematics, University of Waterloo, Waterloo, Ontario, Canada

\*Currently: Department of Mathematical Sciences, University of Cincinnati, Cincinnati, Ohio, USA.

E-mail: tamer.oraby@uc.edu

## Supplementary material

### S1: Model derivations

#### Transmission model

A susceptible-infected-removed (SIR) model with fixed population size and frequency-dependent transmission term is postulated to depict the childhood disease dynamics. Let  $S$ ,  $I$  and  $R$  be the proportions of the susceptible, infected and recovered individuals in the population. The SIR model is given by

$$\left. \begin{aligned} \frac{dS}{dt} &= \mu(1-x) - \beta SI - \mu S \\ \frac{dI}{dt} &= \beta SI - (\mu + \gamma)I \\ \frac{dR}{dt} &= \mu x + \gamma I - \mu R \end{aligned} \right\} \quad (1)$$

where  $\mu$  is the birth (death) rate,  $\beta$  is the disease transmission rate,  $\gamma$  is the recovery rate and  $x$  is the proportion of vaccinated newborn (assumed to be equal to vaccinators by birth uniformity in the population). Since  $S + I + R = 1$ , then the third equation of  $\frac{dR}{dt}$  follows from the first two equations in (1) and so it is removed.

#### Behaviour model

**Imitation dynamics description** Parents adopt one of two strategies: vaccination  $V$  or no-vaccination  $N$ . Let  $p_V := x$  and  $p_N := 1 - p_V$  be the proportion of vaccinators and non-vaccinators in the population. People sample one another or seek sources of information (people are also sources of information) at a rate of  $\kappa$ . Thus, a parent following strategy  $\Theta$  ( $\Theta = V, N$ ) samples a strategy  $\Theta'$  (in the form of adopter

of or promoter for  $\Theta'$ ) with rate  $\kappa p_{\Theta'}$ . Then that individual compares between the payoffs of the current strategy  $\pi(\Theta)$  and the other strategy  $\pi(\Theta')$ . The parent, afterwards, switches to the new strategy only if  $\pi(\Theta') > \pi(\Theta)$  according to a probability given as  $c' (\pi(\Theta') - \pi(\Theta))_+$ ; where  $c'$  is a proportionality constant and  $z_+ = z$  if  $z \in \mathbb{R}_+$  and zero otherwise. Accordingly, the larger is the difference between the two payoffs, the larger is the probability of switching strategies.

The imitation dynamics can be described by

$$\frac{dx}{dt} = \kappa x (1 - x) (c' (\pi(V) - \pi(N))_+ - c' (\pi(N) - \pi(V))_+) \quad (2)$$

where, again,  $c' (\pi(V) - \pi(N))_+$  is the probability that a non-vaccinator switches to a vaccinator (inflow) and  $c' (\pi(N) - \pi(V))_+$  is the probability that a vaccinator switches to a non-vaccinator (outflow). Thus, equation (2) can be rewritten as

$$\frac{dx}{dt} = \kappa c' x (1 - x) (\pi(V) - \pi(N)) \quad (3)$$

**Payoff function** Each of the two groups adopting one of the strategies imposes, uniformly, a social group pressure  $\delta_0$  on its members. Hence, a parent adopting strategy  $\Theta$  experiences an average group pressure of  $\delta_0 p_{\Theta}$ . The average group pressure is comprised of the injunctive norm component  $\delta_0$  and the descriptive norm component  $p_{\Theta}$ . See also the introduction and [1].

Therefore, the payoff of any strategy  $\Theta$  is defined by the gain of full health due to applying that strategy, in one's own perspective, and the pressure (reward) imposed by the group adopting strategy  $\Theta$  minus the perceived risks the strategy imposes. That is, the payoff of vaccination is given by

$$e_v = -r_v + \delta_0 p_V$$

where  $r_v$  is the perceived risk of vaccination's side effects which we posit, based on [2], to be of the form  $r_v(t) = m + m(\sigma - 1)(1 - (t - t_s)/D) \mathbf{1}_{[t_s, t_s+D]}(t)$ ; where  $m$  is the perceived magnitude of risk before the year  $t_s$ ,  $\sigma$  is the relative risk at the scare,  $D$  is the number of years of decay for the risk perception (representing memory loss effect or vividness of the information), and  $\mathbf{1}_{[t_s, t_s+D]}(t)$  is the Heaviside function that is equal to one if  $t_s \leq t \leq t_s + D$  and zero otherwise. The payoff of no-vaccination

is given by

$$e_n = -r_i + \delta_0 p_N$$

where  $r_i$  is the perceived risk of infection. The perceived risk of infection  $r_i$  is given by  $cI$  where  $I$  is the actual prevalence given via equation (1) and the parameter  $c$  is the multiplicative product of three quantities: the proportionality constant of the probability of catching the disease, the reporting probability (assumed to be constant over time), and the cost/consequence of infection. Let  $\kappa' = \kappa c' c$ ,  $\delta = \frac{\delta_0}{c}$  and

$$\omega(t) := \frac{1}{c} r_v(t) = m' + m'(\sigma - 1)(1 - (t - t_s)/D) \mathbf{1}_{[t_s, t_s + D]}(t) \quad (4)$$

Therefore, equation (3) becomes

$$\frac{dx}{dt} = \kappa' x(1 - x) (-\omega(t) + I + \delta(2x - 1)) \quad (5)$$

In the main part of the paper, we will drop the prime in the parameters' notation for brevity and as they will be irrelevant to the results.

## **S2: Pertussis vaccine coverage and incidence in the UK**

**Table 1.** Pertussis vaccine coverage and disease incidence in the UK in the period 1967-2010.

| Year | Coverage | Incidence   | Year | Coverage | Incidence   |
|------|----------|-------------|------|----------|-------------|
| 1967 | 0.78     | 0.065702282 | 1989 | 0.84     | 0.02205659  |
| 1968 | 0.78     | 0.034970569 | 1990 | 0.88     | 0.029764297 |
| 1969 | 0.78     | 0.011656856 | 1991 | 0.92     | 0.011260422 |
| 1970 | 0.78     | 0.033910855 | 1992 | 0.93     | 0.004929348 |
| 1971 | 0.78     | 0.033910855 | 1993 | 0.93     | 0.008456968 |
| 1972 | 0.78     | 0.004238857 | 1994 | 0.94     | 0.008670274 |
| 1973 | 0.77     | 0.005298571 | 1995 | 0.94     | 0.004300184 |
| 1974 | 0.59     | 0.032071056 | 1996 | 0.92     | 0.004882743 |
| 1975 | 0.38     | 0.0195433   | 1997 | 0.91     | 0.006576646 |
| 1976 | 0.39     | 0.010022205 | 1998 | 0.92     | 0           |
| 1977 | 0.31     | 0.033073277 | 1999 | 0.91     | 0           |
| 1978 | 0.35     | 0.129286446 | 2000 | 0.91     | 0.001552296 |
| 1979 | 0.41     | 0.05913101  | 2001 | 0.91     | 0.001880322 |
| 1980 | 0.46     | 0.041091041 | 2002 | 0.91     | 0.001889284 |
| 1981 | 0.53     | 0.038468628 | 2003 | 0.92     | 0.000933887 |
| 1982 | 0.59     | 0.127137732 | 2004 | 0.91     | 0.000302931 |
| 1983 | 0.65     | 0.038698067 | 2005 | 0.92     | 0.000641711 |
| 1984 | 0.65     | 0.011505993 | 2006 | 0.92     | 0.00085681  |
| 1985 | 0.67     | 0.043457128 | 2007 | 0.92     | 0.002084666 |
| 1986 | 0.73     | 0.071590259 | 2008 | 0.93     | 0.00184268  |
| 1987 | 0.75     | 0.0300977   | 2009 | 0.94     | 0.001516447 |
| 1988 | 0.78     | 0.009810298 | 2010 | 0.95     | 0.00092851  |

### S3: Model extension

This extension owes to the fact that there is another group that do not vaccinate at all—we call them all-time nonvaccinators—due to religious or alternative medicine reasons [3, 4, 5]. Let  $q$  be the proportion of all-time nonvaccinators such that  $q + p_V + p_N = 1$  and  $0 < q < 1$  is constant. Then the coupled incidence-behaviour model (equation (4) in main text) will be given by

$$\left. \begin{aligned} \frac{dS}{dt} &= \mu(1-x) - \beta SI - \mu S \\ \frac{dI}{dt} &= \beta SI - (\mu + \gamma)I \\ \frac{dx}{dt} &= \kappa x(1-x-q) (-\omega(t) + I + \delta(2x-1)) \end{aligned} \right\} \quad (6)$$

where  $x = p_V$ ; under the assumption that all-time nonvaccinators are also invoking a pressure. The equilibrium points of (equation (4) in main text) and (6) are the same except for the first one  $\mathcal{E}_1$ ; instead we have  $\mathcal{E}'_1 = (\frac{1}{R_0}, \frac{\mu}{\mu+\gamma}(q - \frac{1}{R_0}), 1 - q)$  as another equilibrium point for the model (6). Hence, we can have a below full vaccine coverage as an equilibrium if  $R_0 > \frac{1}{q}$  which is stable if and only if

$$m < \delta(1 - 2q) + \frac{\mu}{\mu + \gamma}(q - \frac{1}{R_0}) \quad (7)$$

The model can possess from one to two bistability regions depending on the proportion of all-time nonvaccinators  $q$ , Figure FS3 (c).  $\mathcal{E}'_1$  can be the only stable fixed point with less than 100% vaccine coverage rate and extremely reduced incidence, Figure FS3 (a) and (b).

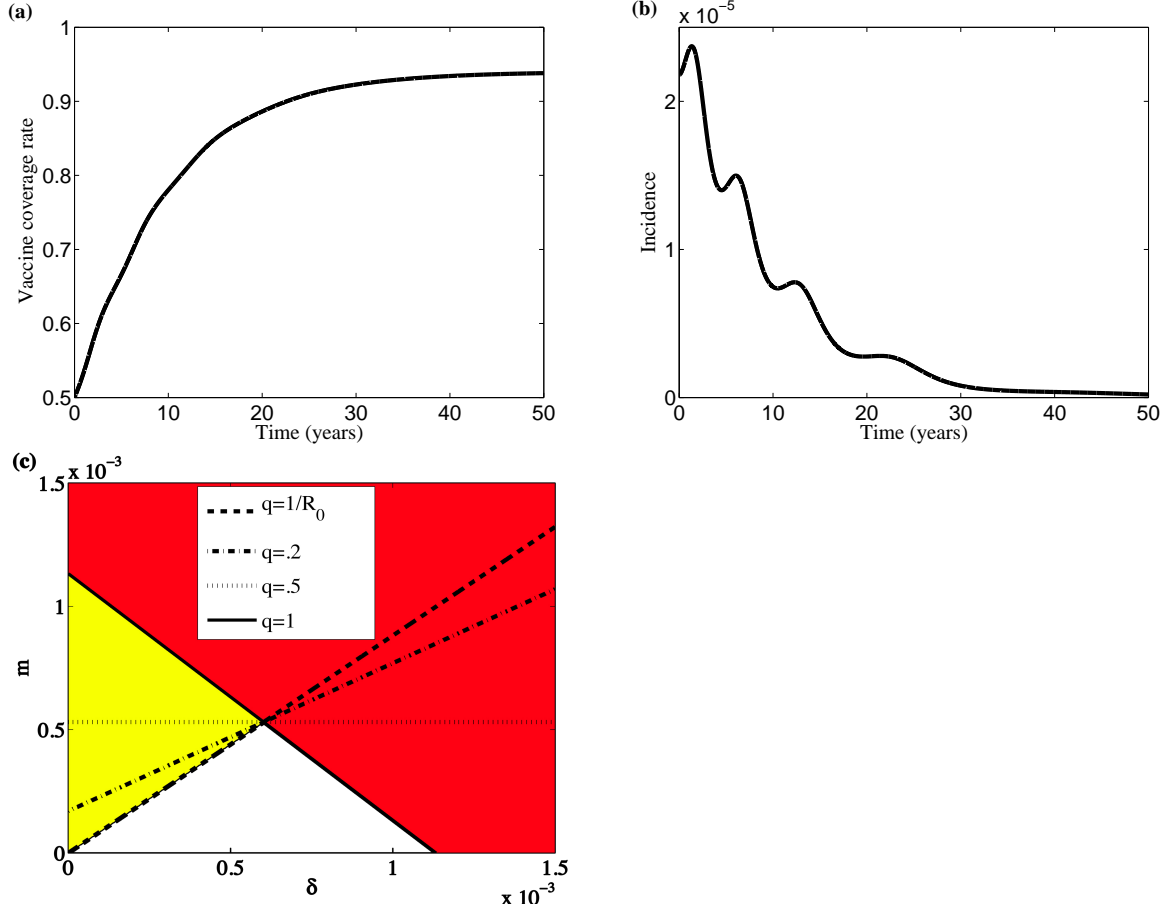

**Figure FS3.** Simulation of vaccination rate and incidence (panels (a) and (b)) without vaccine scare when proportion of all-time nonvaccinators  $q = .06$  for  $(\delta, m) = (.0005, .00025)$ . (c)  $\delta - m$  parameter diagram for stability of the equilibrium points for the model (6).  $\mathcal{E}'_1$  is stable below each line corresponding to the values of  $q = 1/R_0, .2, .5$  and 1. The equilibrium point  $\mathcal{E}_4$  is stable in the red colored region.  $\mathcal{E}_5$  is stable in the yellow colored region.

A further extension to model (6) is to incorporate  $p$  ( $0 \leq p < 1$ ) the proportion of parents who vaccinate all the time. Under the assumption that the all-time vaccinators are also invoking a pressure  $\delta$ , the third equation in the model becomes

$$\frac{dx}{dt} = \kappa(x - p)(1 - x - q)(-\omega(t) + I + \delta(2x - 1)) \quad (8)$$

where  $x = p + p_V$ . The equilibrium points of the new model are the same as of (6) except  $\mathcal{E}_2$  and  $\mathcal{E}_4$  which become  $\mathcal{E}'_2 = (1 - p, 0, p)$  and  $\mathcal{E}'_4 = (\frac{1}{R_0}, \frac{\mu}{\mu + \gamma}(1 - p - \frac{1}{R_0}), p)$ , respectively. The endemic equilibrium

point  $\mathcal{E}'_4$  exists if and only if  $R_0 > \frac{1}{1-p}$  and is stable when

$$m > (2p-1)\delta + \frac{\mu}{\mu+\gamma}\left(1-p-\frac{1}{R_0}\right) \quad (9)$$

The disease-free equilibrium  $\mathcal{E}'_2$  is stable if  $R_0 < \frac{1}{1-p}$  and  $m > (2p-1)\delta$ . This time a large proportion of all-time vaccinators insures the first condition for many childhood diseases while small pressure is needed for the second condition so as to insure disease eradication stability.

#### S4: Parameter estimates

Table 2 shows the estimates of the parameters in the main model (equation (4) in main text) with and without group pressure. Apparently, there is no significant difference between estimates.

**Table 2. Parameters' estimated values for the model without and with pressure.**

| Parameters       | Without pressure<br>in the period 1971-1988 | Without pressure<br>in the period 1967-2010 | With pressure<br>in the period 1967-2010 |
|------------------|---------------------------------------------|---------------------------------------------|------------------------------------------|
| $\kappa$         | 1.48                                        | 2.49                                        | 1.69                                     |
| $m$              | $8.41 \times 10^{-5}$                       | $4.21 \times 10^{-5}$                       | $8.43 \times 10^{-5}$                    |
| $\sigma$         | 27                                          | 33.59                                       | 26.1                                     |
| $D$ (years)      | 5.85                                        | 9.1                                         | 5.89                                     |
| $\delta$         | –                                           | –                                           | $1.95 \times 10^{-4}$                    |
| RSS <sup>1</sup> | .0098                                       | .0748                                       | .0487                                    |
| AIC <sub>c</sub> | –73.17                                      | –144.14                                     | –160.32                                  |

---

<sup>1</sup>RSS: residuals sum of squares.



### S5: The equilibrium point $\mathcal{E}_5$

The last equilibrium  $\mathcal{E}_5$  exists in two regions depending on whether  $\delta$  is less or greater than  $\frac{1}{2} \frac{\mu}{\mu + \gamma}$ . The two regions are

$$\mathcal{R}_1 = \left\{ (\delta, m) \in \mathbb{R}_+^2 : \delta < \frac{1}{2} \frac{\mu}{\mu + \gamma} \text{ and } \delta \left(1 - \frac{2}{R_0}\right) < m < -\delta + \frac{\mu}{\mu + \gamma} \left(1 - \frac{1}{R_0}\right) \right\}$$

and

$$\mathcal{R}_2 = \left\{ (\delta, m) \in \mathbb{R}_+^2 : \delta > \frac{1}{2} \frac{\mu}{\mu + \gamma} \text{ and } \delta \left(1 - \frac{2}{R_0}\right) > m > -\delta + \frac{\mu}{\mu + \gamma} \left(1 - \frac{1}{R_0}\right) \right\}$$

Using the necessary and sufficient condition of the Routh-Hurwitz criterion, the disease endemic equilibrium  $\mathcal{E}_5$  is stable if and only if  $a_i > 0$  for  $i = 1, 2, 3$  and  $a_1 a_2 - a_3 > 0$  where

$$\begin{aligned} a_1 &= \mu + \beta I_5 - 2\kappa\delta x_5(1 - x_5) \\ a_2 &= \beta I_5(\mu + \gamma) - 2\kappa\delta x_5(1 - x_5)(\mu + \beta I_5) \\ a_3 &= \kappa x_5(1 - x_5)\beta I_5(\mu - 2\delta(\mu + \gamma)) \end{aligned} \tag{10}$$

Clearly, the condition  $a_3 > 0$  can be only valid in the region  $\mathcal{R}_1$  which is the dark grey region in Figure 2. We have found in the numerical solutions below that  $\mathcal{E}_5$  is stable in the region  $\mathcal{R}_1$ .

The reason that simulation show large oscillations where  $\mathcal{E}_5$  should be stable is the very small value of the real eigenvalue of the Jacobian matrix of the system (6) at the fixed point  $\mathcal{E}_5$  (Figure FS5.1). Choosing other pairs like  $(\delta, m) = (1.5 \times 10^{-5}, .00067)$  would result in a better numerical simulation of the vaccine coverage convergence to  $\mathcal{E}_5$  (Figure FS5.2) even if it is very slow.

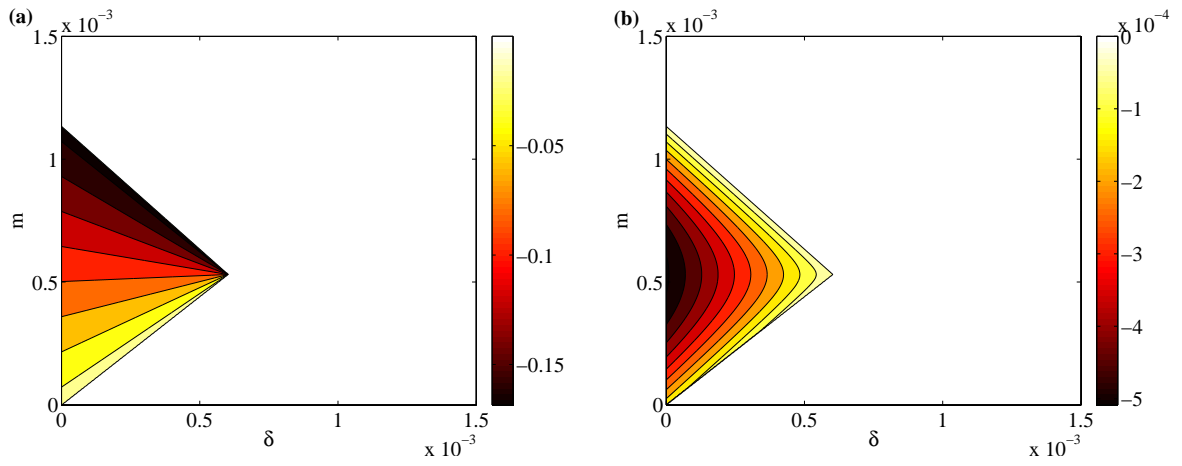

**Figure FS5.1.** (a) The real part of the two conjugate complex eigenvalues of the Jacobian matrix of the system (equation (4) in main text) at the fixed point  $\mathcal{E}_5$  shown in its stability region. (b) The third eigenvalue of the Jacobian matrix of the system (equation (4) in main text) at the fixed point  $\mathcal{E}_5$  shown in its stability region.

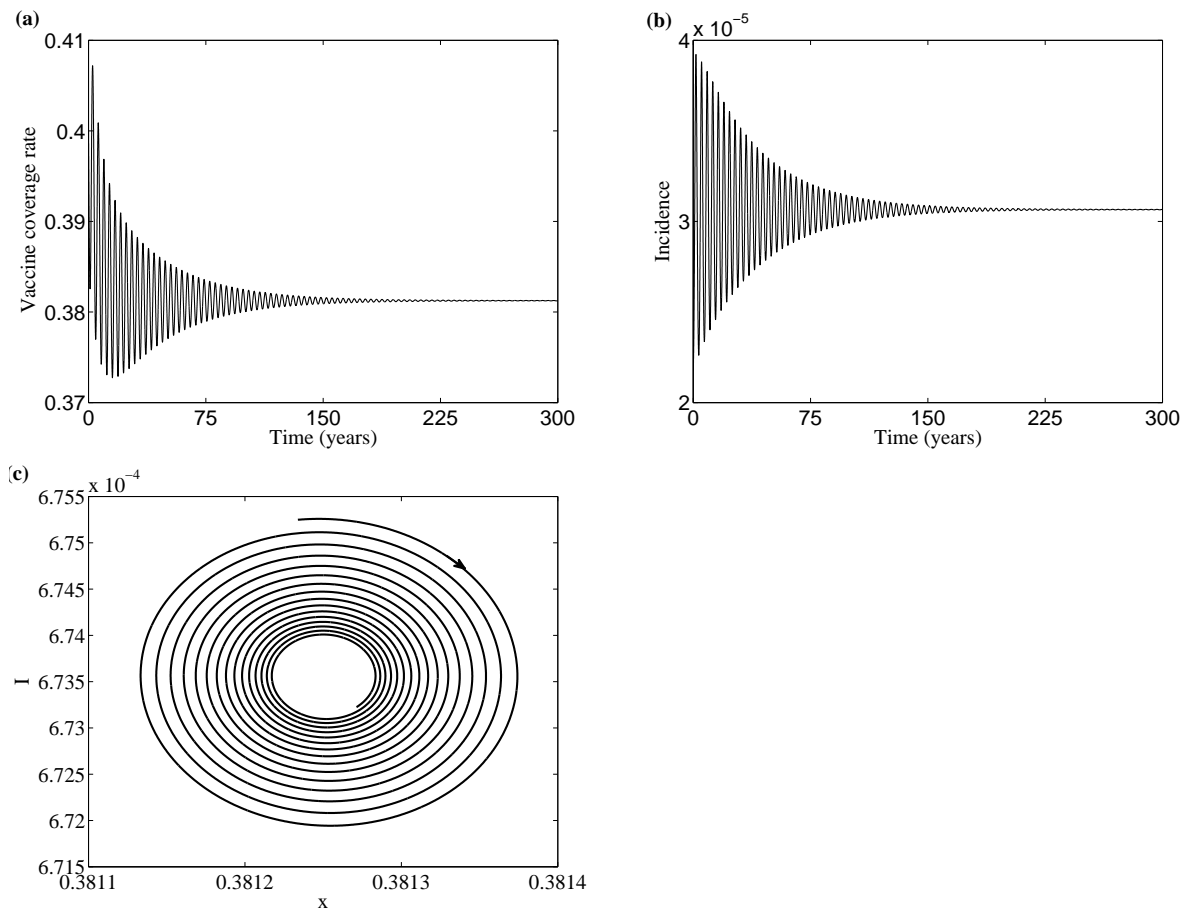

**Figure FS5.2.** Simulation of vaccine coverage rate and incidence without vaccine scare for  $(\delta, m) = (1.5 \times 10^{-5}, .00067)$  (panels (a) and (b)). (c) Phase diagram for the last few years of the simulation showing that the convergence is slow.

## References

- [1] Lapinski, M. K. & Rimal, R. N. 2005 An explication of social norms. Commun. Theor. **15**, 127–147.
- [2] Bauch, C. T. & Bhattacharyya, S. 2012 Evolutionary game theory and social learning can determine how vaccine scares unfold. PLoS Comput. Biol. **8**, e1002452.
- [3] Smith, P. J., Humiston, S. G., Marcuse, E. K., Zhao, Z., Dorell, C. G., Howes, C. & Hibbs, B. 2011 Parental delay or refusal of vaccine doses, childhood vaccination coverage at 24 months of age, and the health belief model. Public Health Rep. **126 Suppl 2**, 135–146.
- [4] Mills, E., Jadad, A. R., Ross, C. & Wilson, K. 2005 Systematic review of qualitative studies exploring parental beliefs and attitudes toward childhood vaccination identifies common barriers to vaccination. J. Clin. Epidemiol. **58**, 1081–1088.
- [5] Downs, J. S., de Bruin, W. B. & Fischhoff, B. 2008 Parents vaccination comprehension and decisions. Vaccine **26**, 1595–1607.
